# Supplementary material
Source: PubMed Central journal article supplement (PMC3147996)

PB1

A

Jordan-2 (2010)

Israel-2/3 (2003-09)

Jordan-1 (2004/2007)

Saudi Arabia

Israel-1 (2000-03)

Saudi Arabia

Eurasia

Afghanistan 2008

Pakistan

Afghanistan 2009

Iran 2009

Pakistan

Iran-2 (2008)

Europe

Eurasia

Iraq-Kurdistan 2009

Iran 2009

H7N3 Pakistan

UAE 2008

UAE 2000-03

Iran-1 (1999/2002)

Europe

H9N2-Y280

Pakistan 1999

G1

H5N1

H9N2-Korea

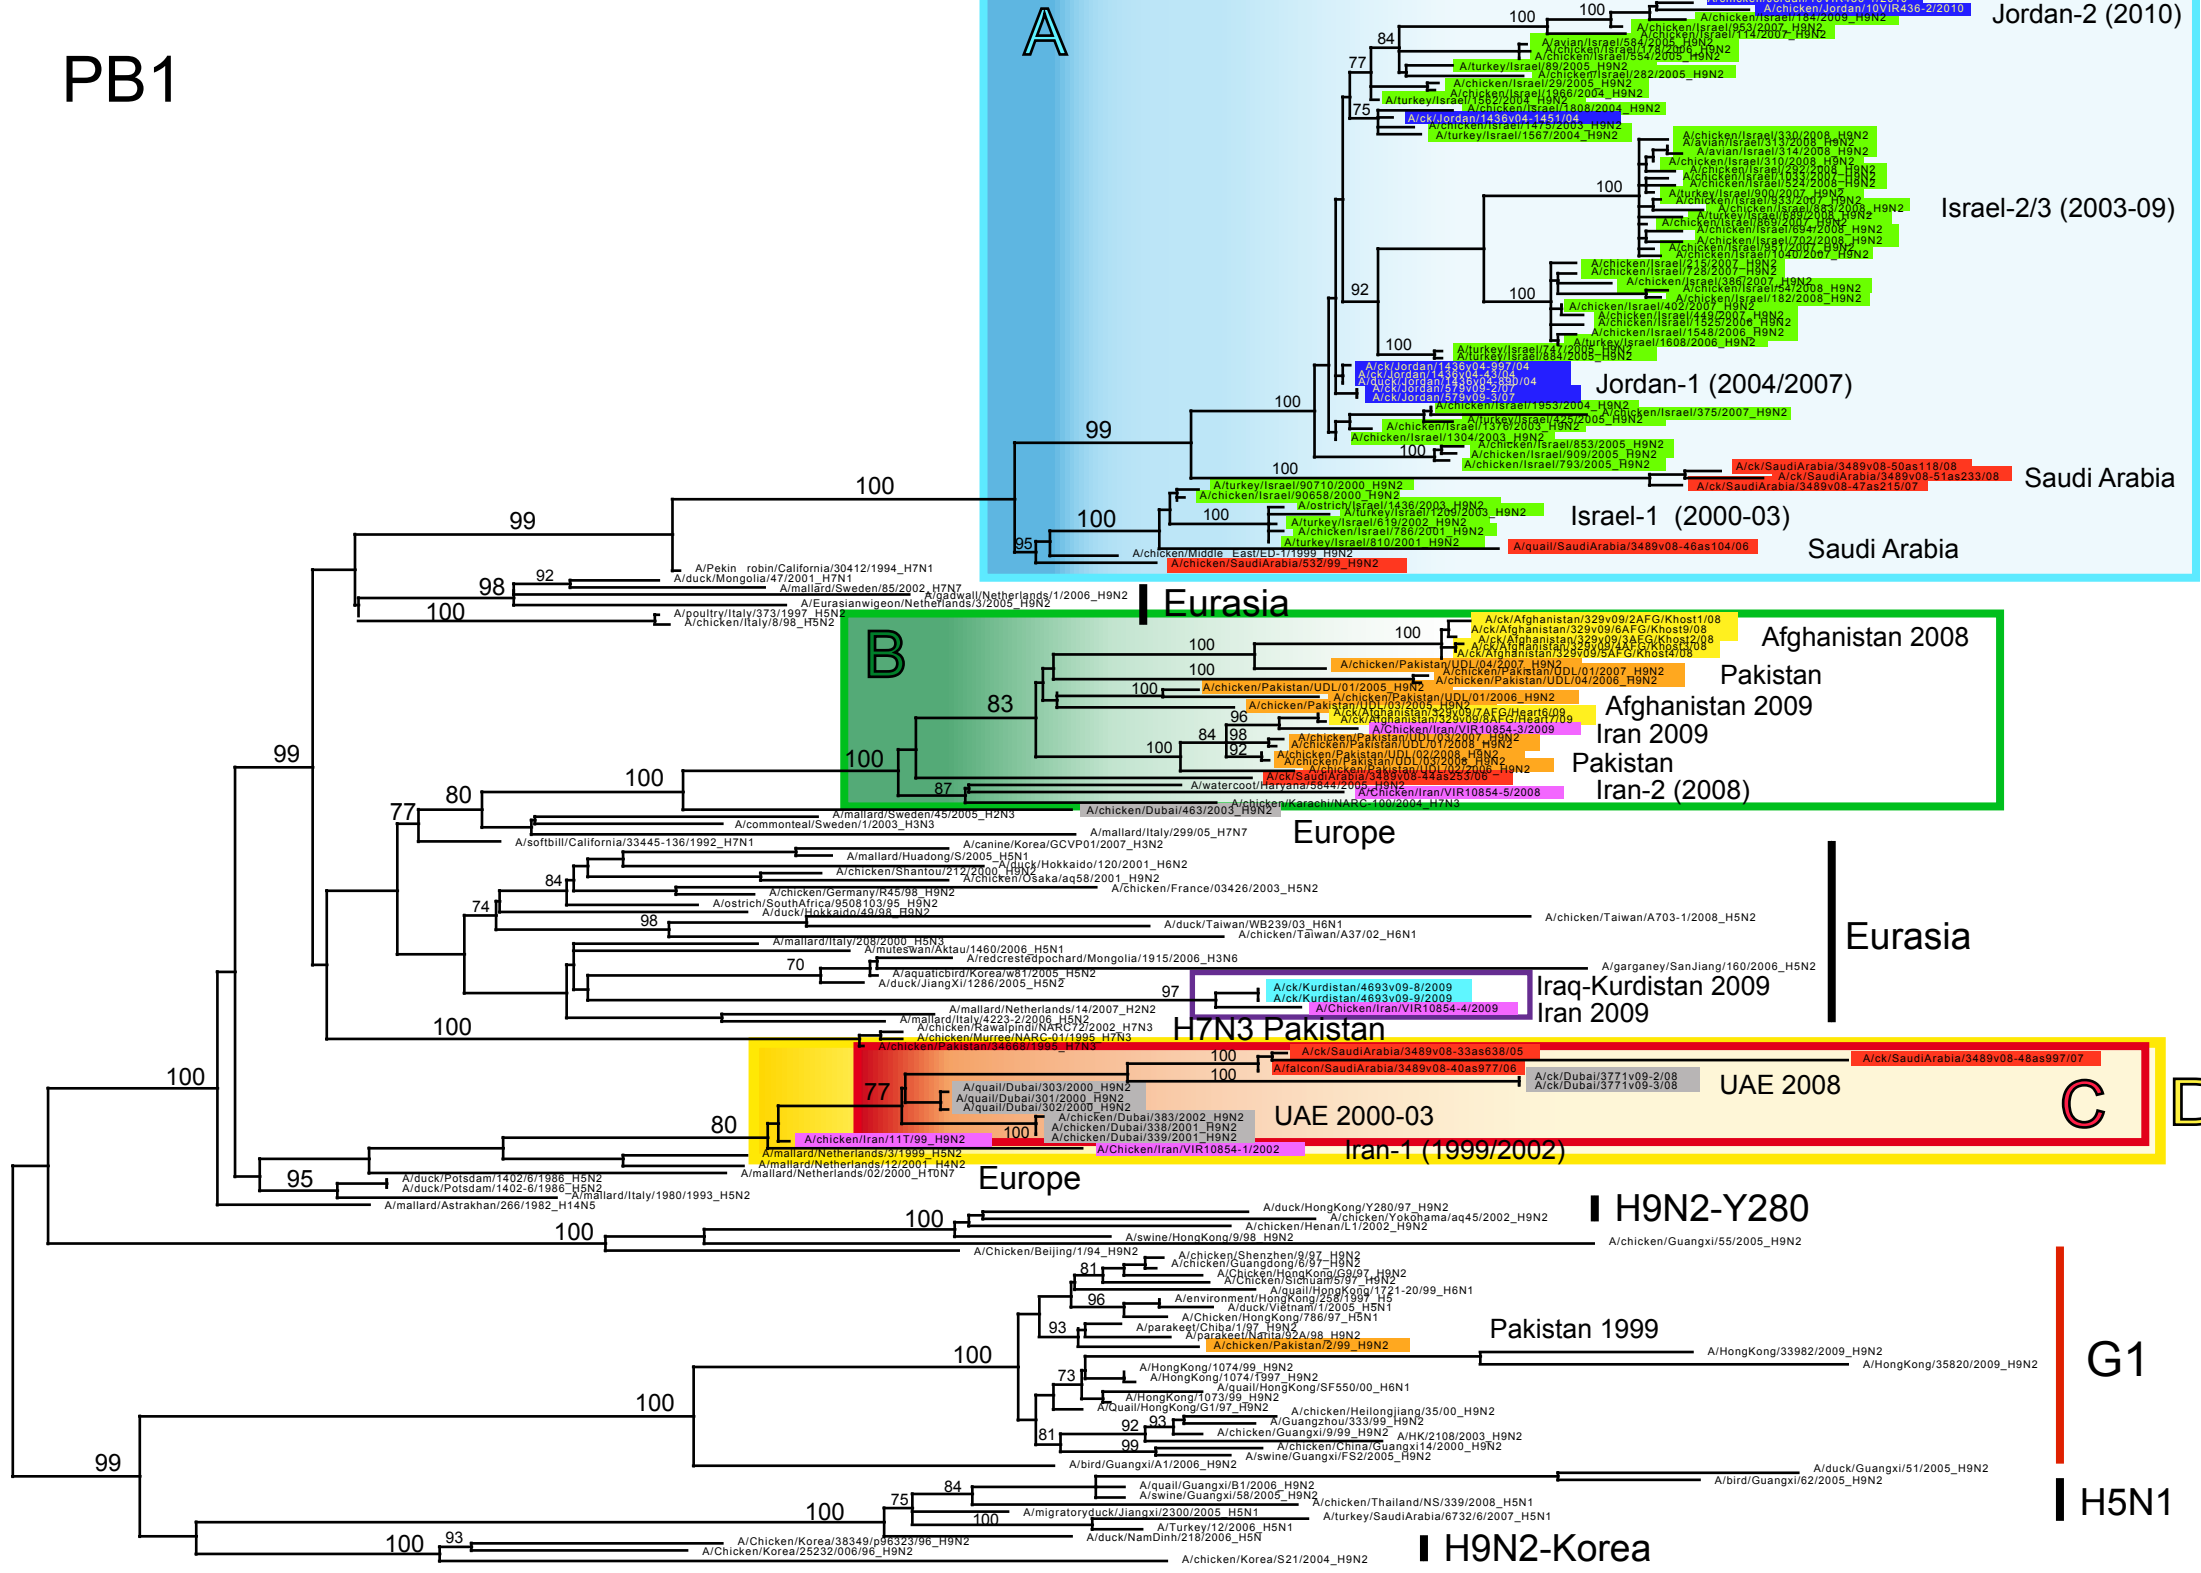

Supplement: supp_85_16_8413__2.pdf [file supp_85_16_8413__2.pdf]
