# Supplementary material
Source: PubMed Central journal article supplement (PMC3147996)
Supplement: supp_85_16_8413__3.pdf [file supp_85_16_8413__3.pdf]

PA

A

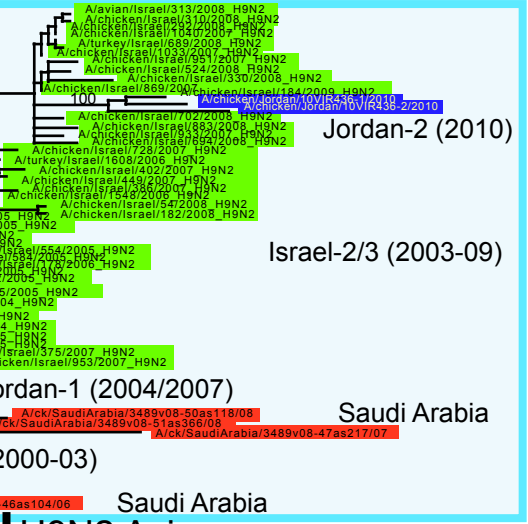

H9N2 Asia

H5N1

B

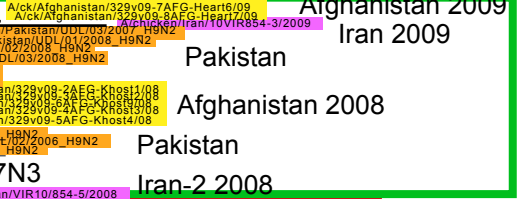

Saudi Arabia

UAE 2008

UAE 2000-03

Eurasia

Iraq-Kurdistan 2009

Iran 2009

Eurasia

Iran-1 (1999/2002)

Eurasia

H7N3 Pakistan

H9N2 Korea

G1

Pakistan 1999

H9N2-Y280

C

D

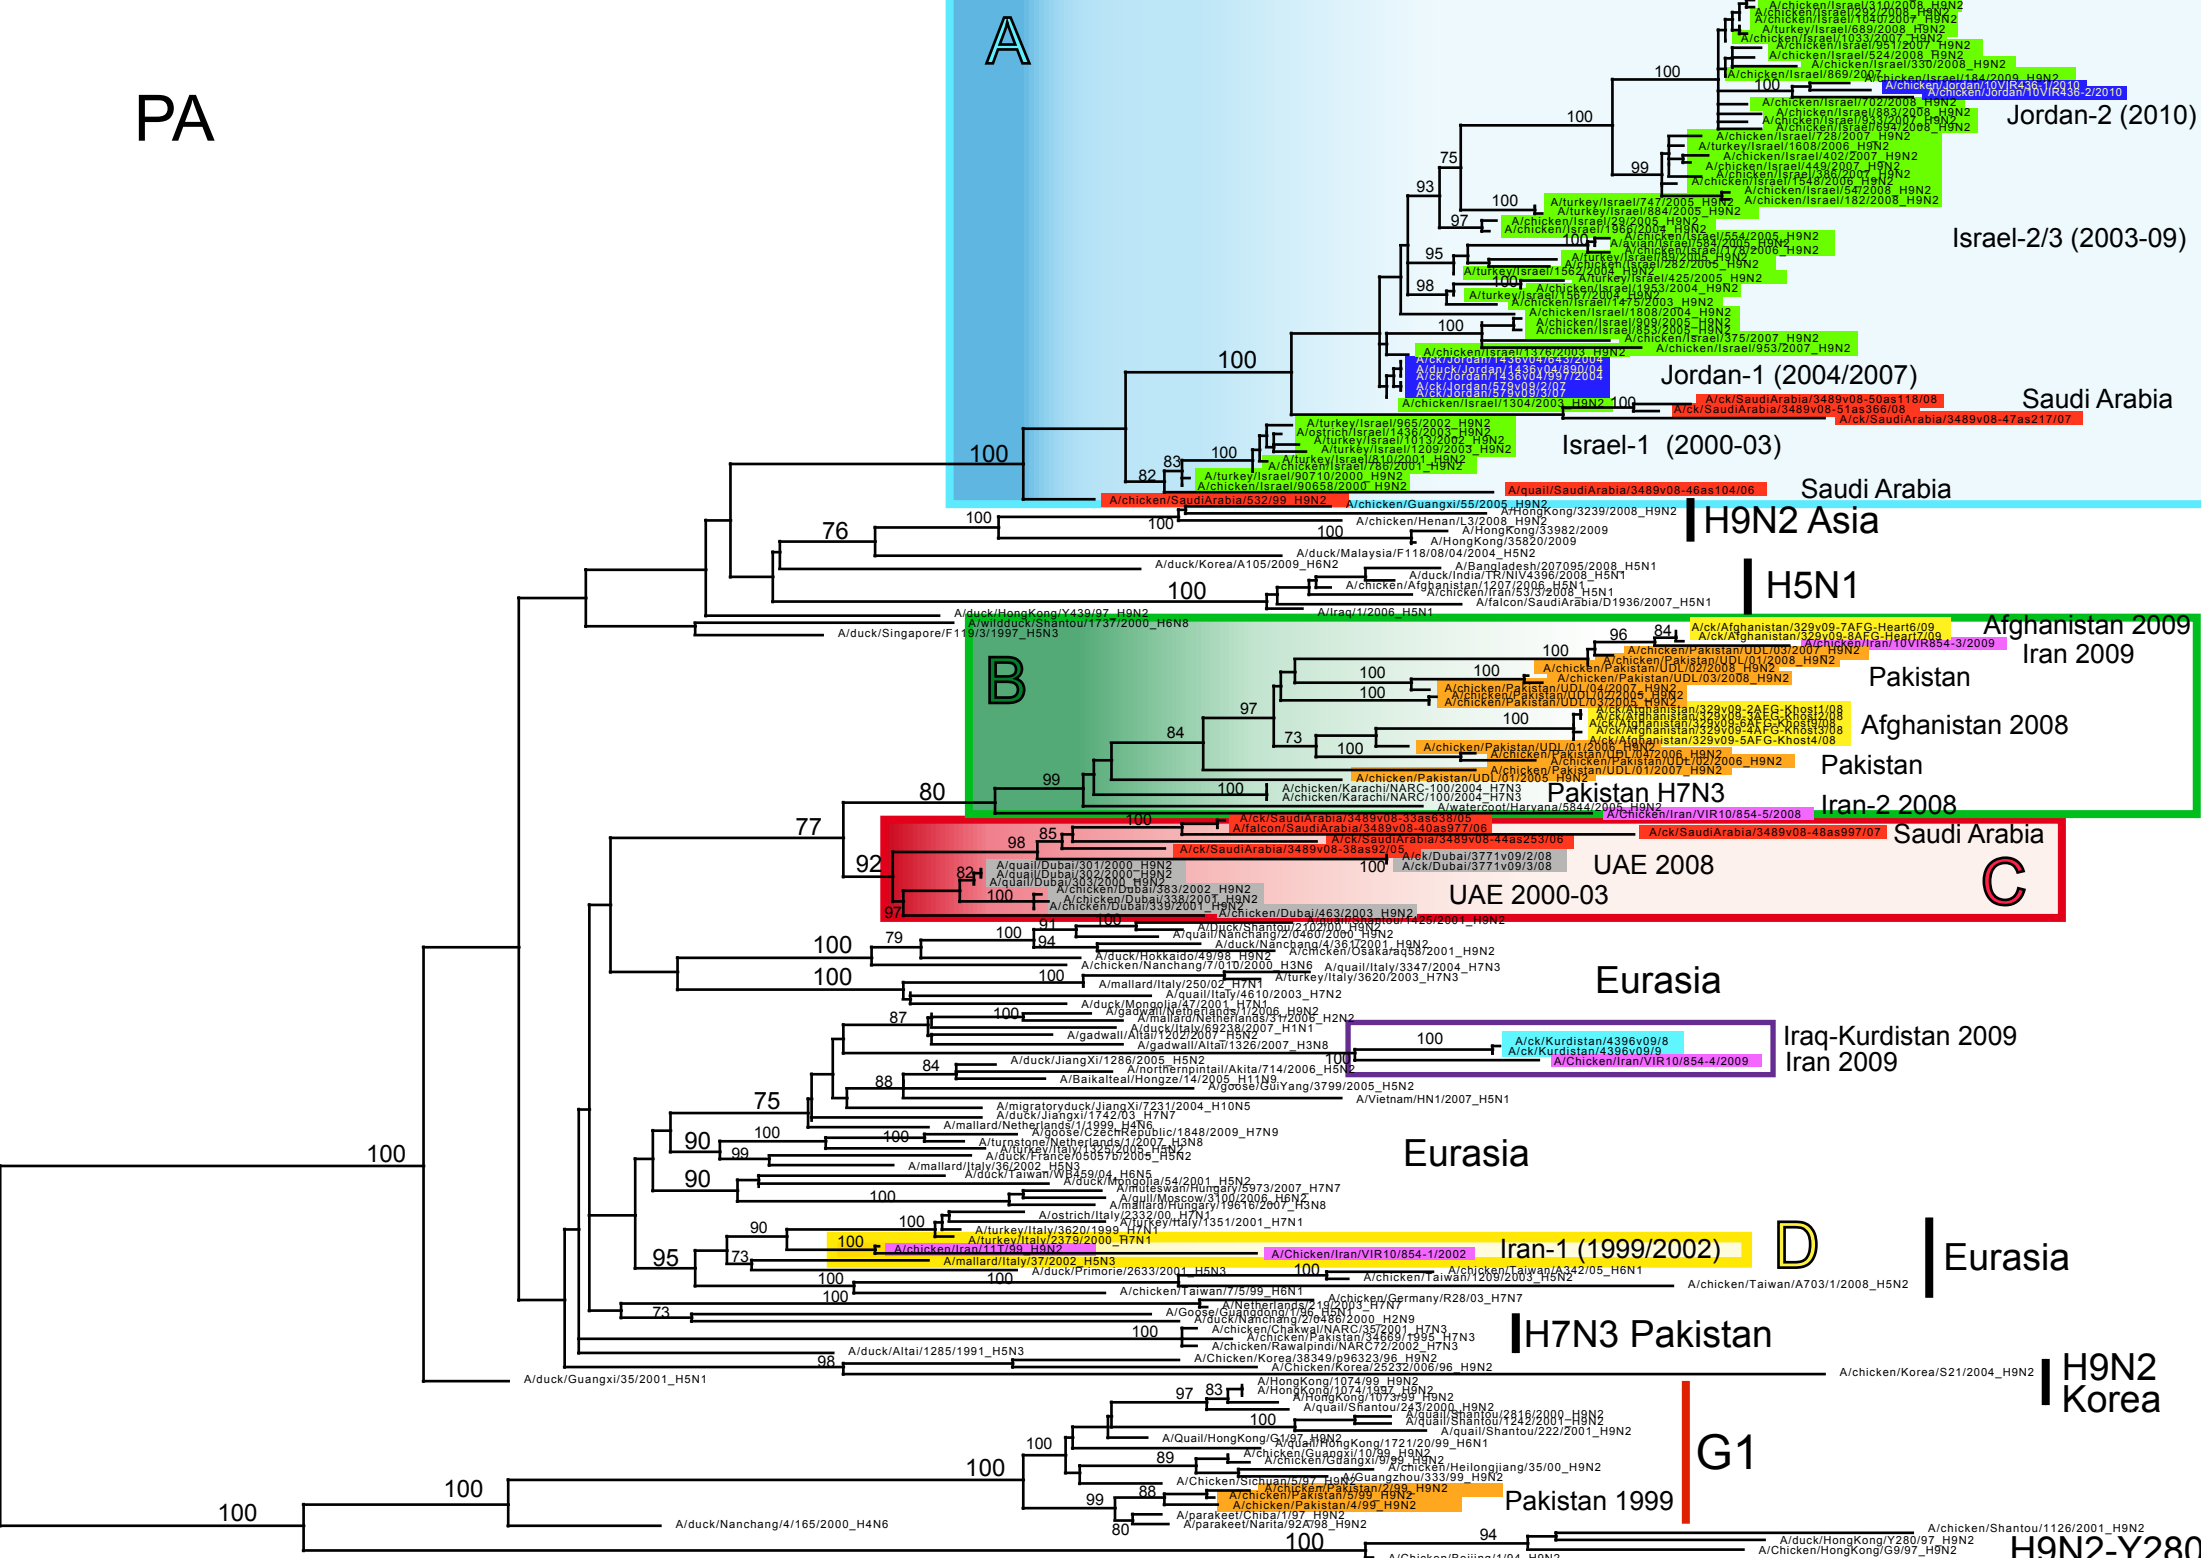

100

100

100

100

100

100

100

100

100

100

100

100

100

100

100

100

100

100

100

100

100

100

100

100

100

100

100

100

100

100

100

100

100

100

100

100

100

100

100

100

100

100

100

100

100

100

100

100

100

100

100

100

100

100

100

100

100

100

100

100

100

100

100

100

100

100

100

100

100

100
