# Supplementary material
Source: PubMed Central journal article supplement (PMC3147996)

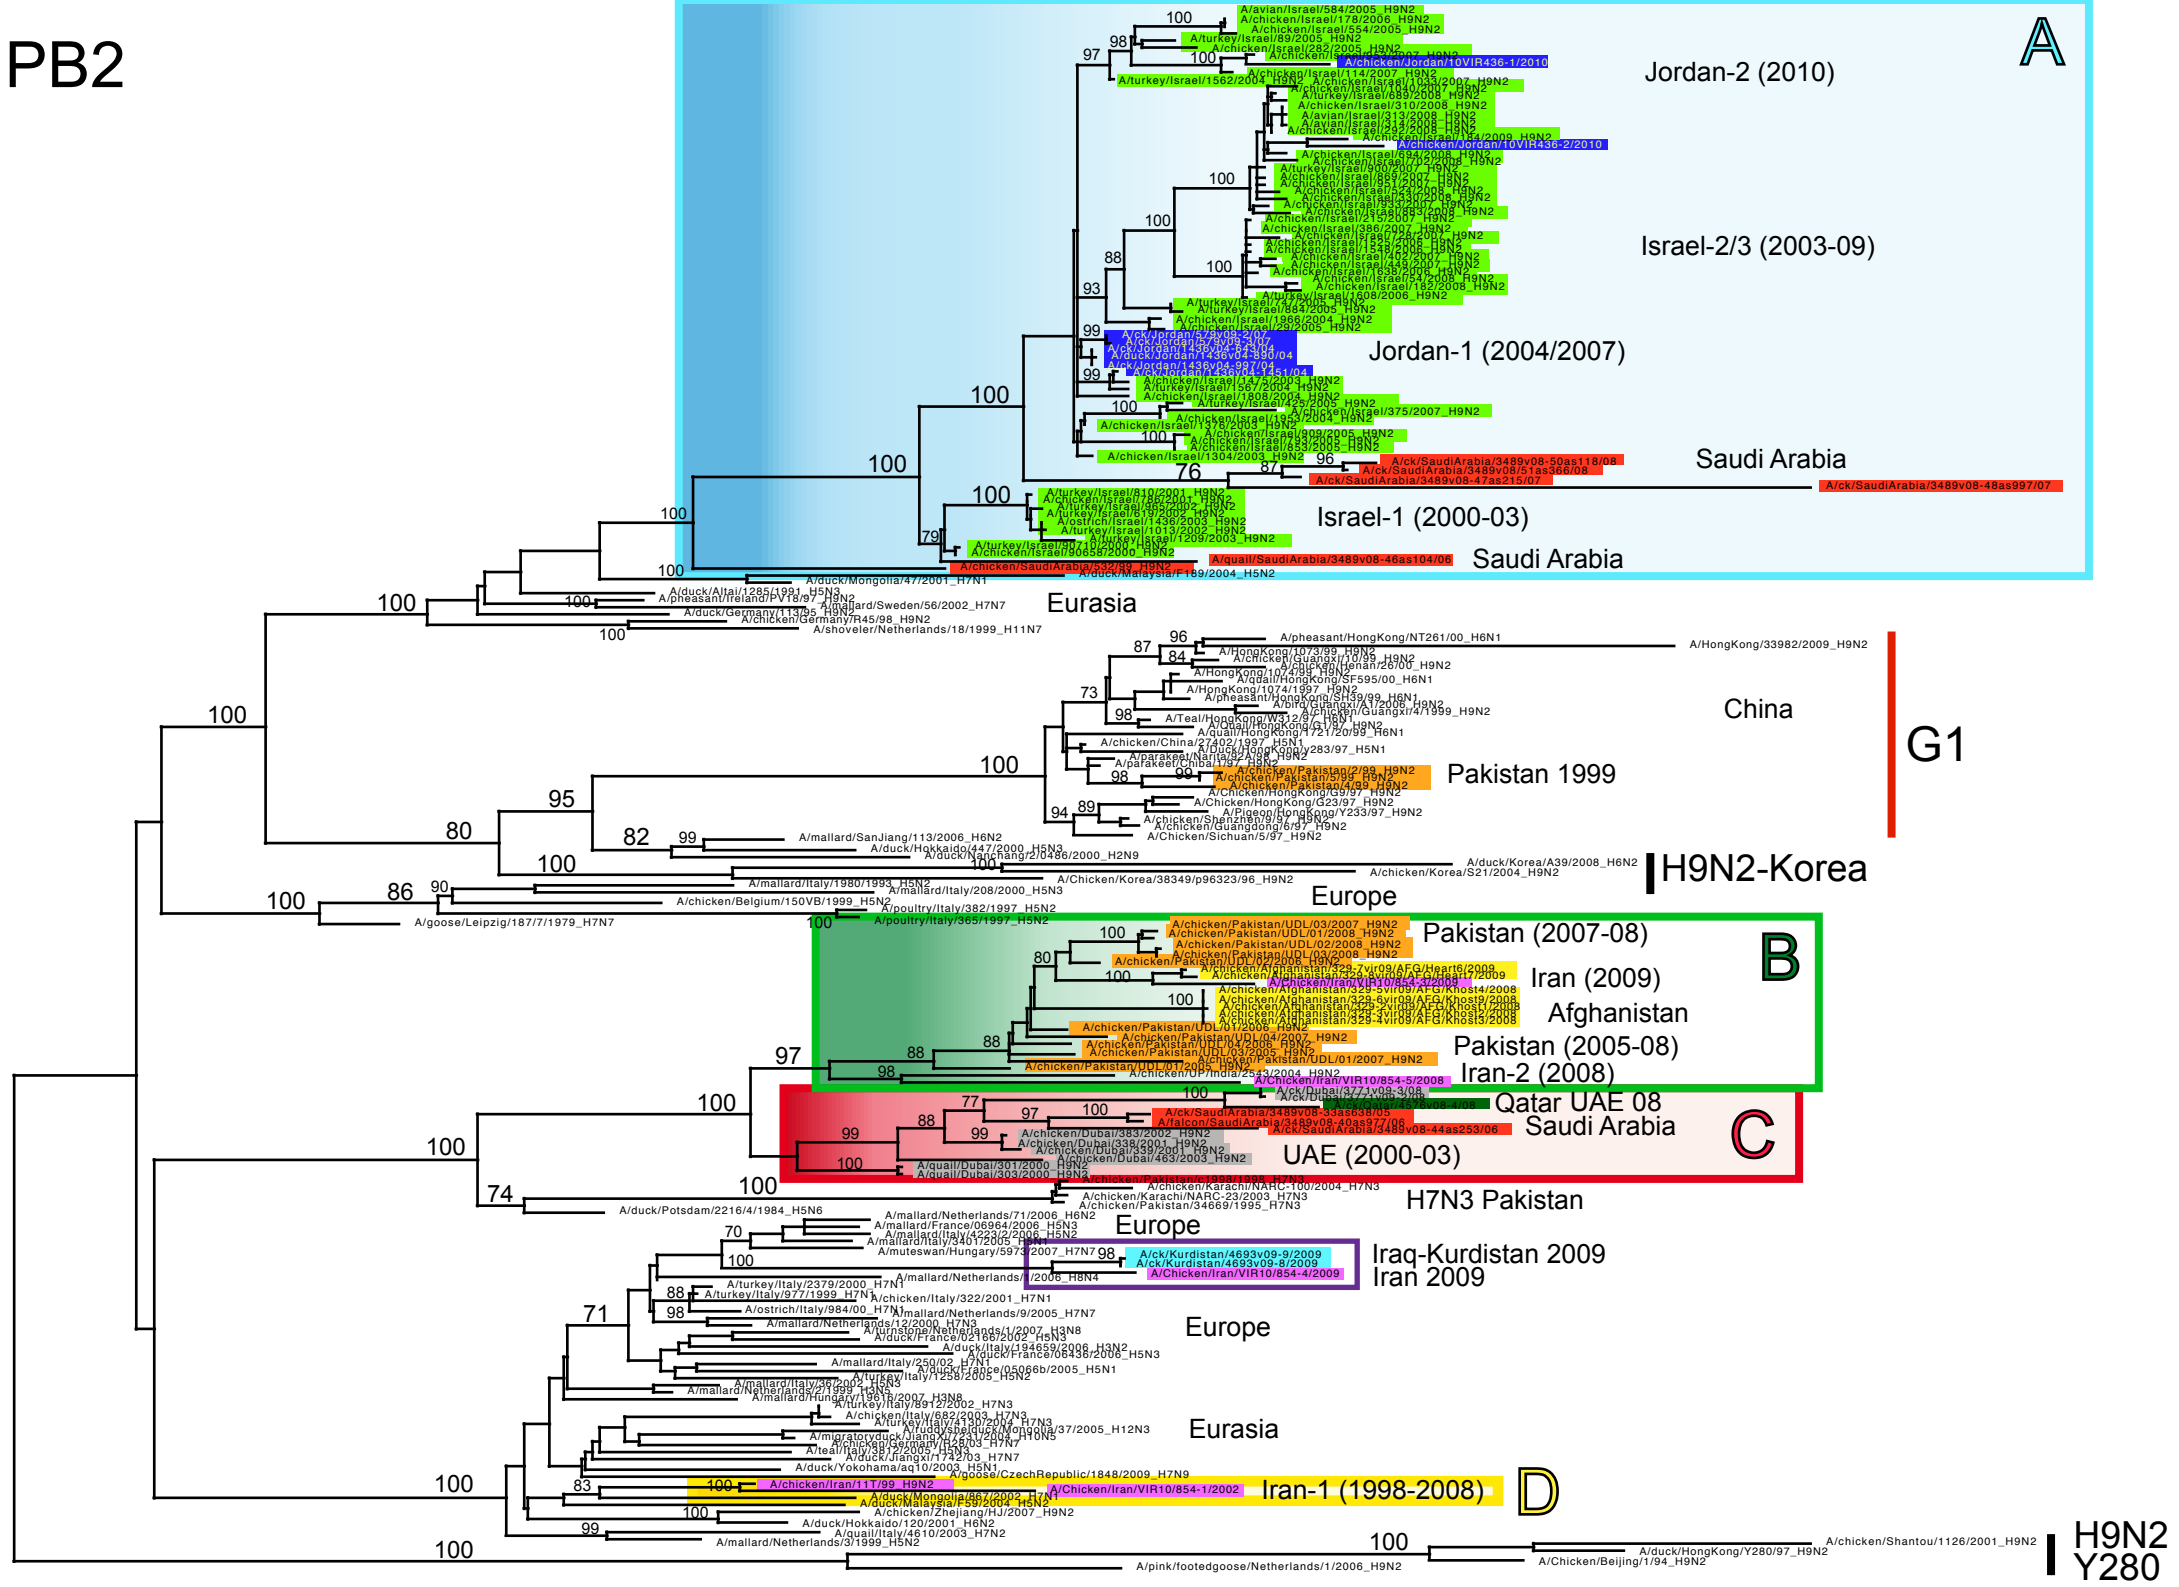

Supplement: supp_85_16_8413__1.pdf [file supp_85_16_8413__1.pdf]

NP

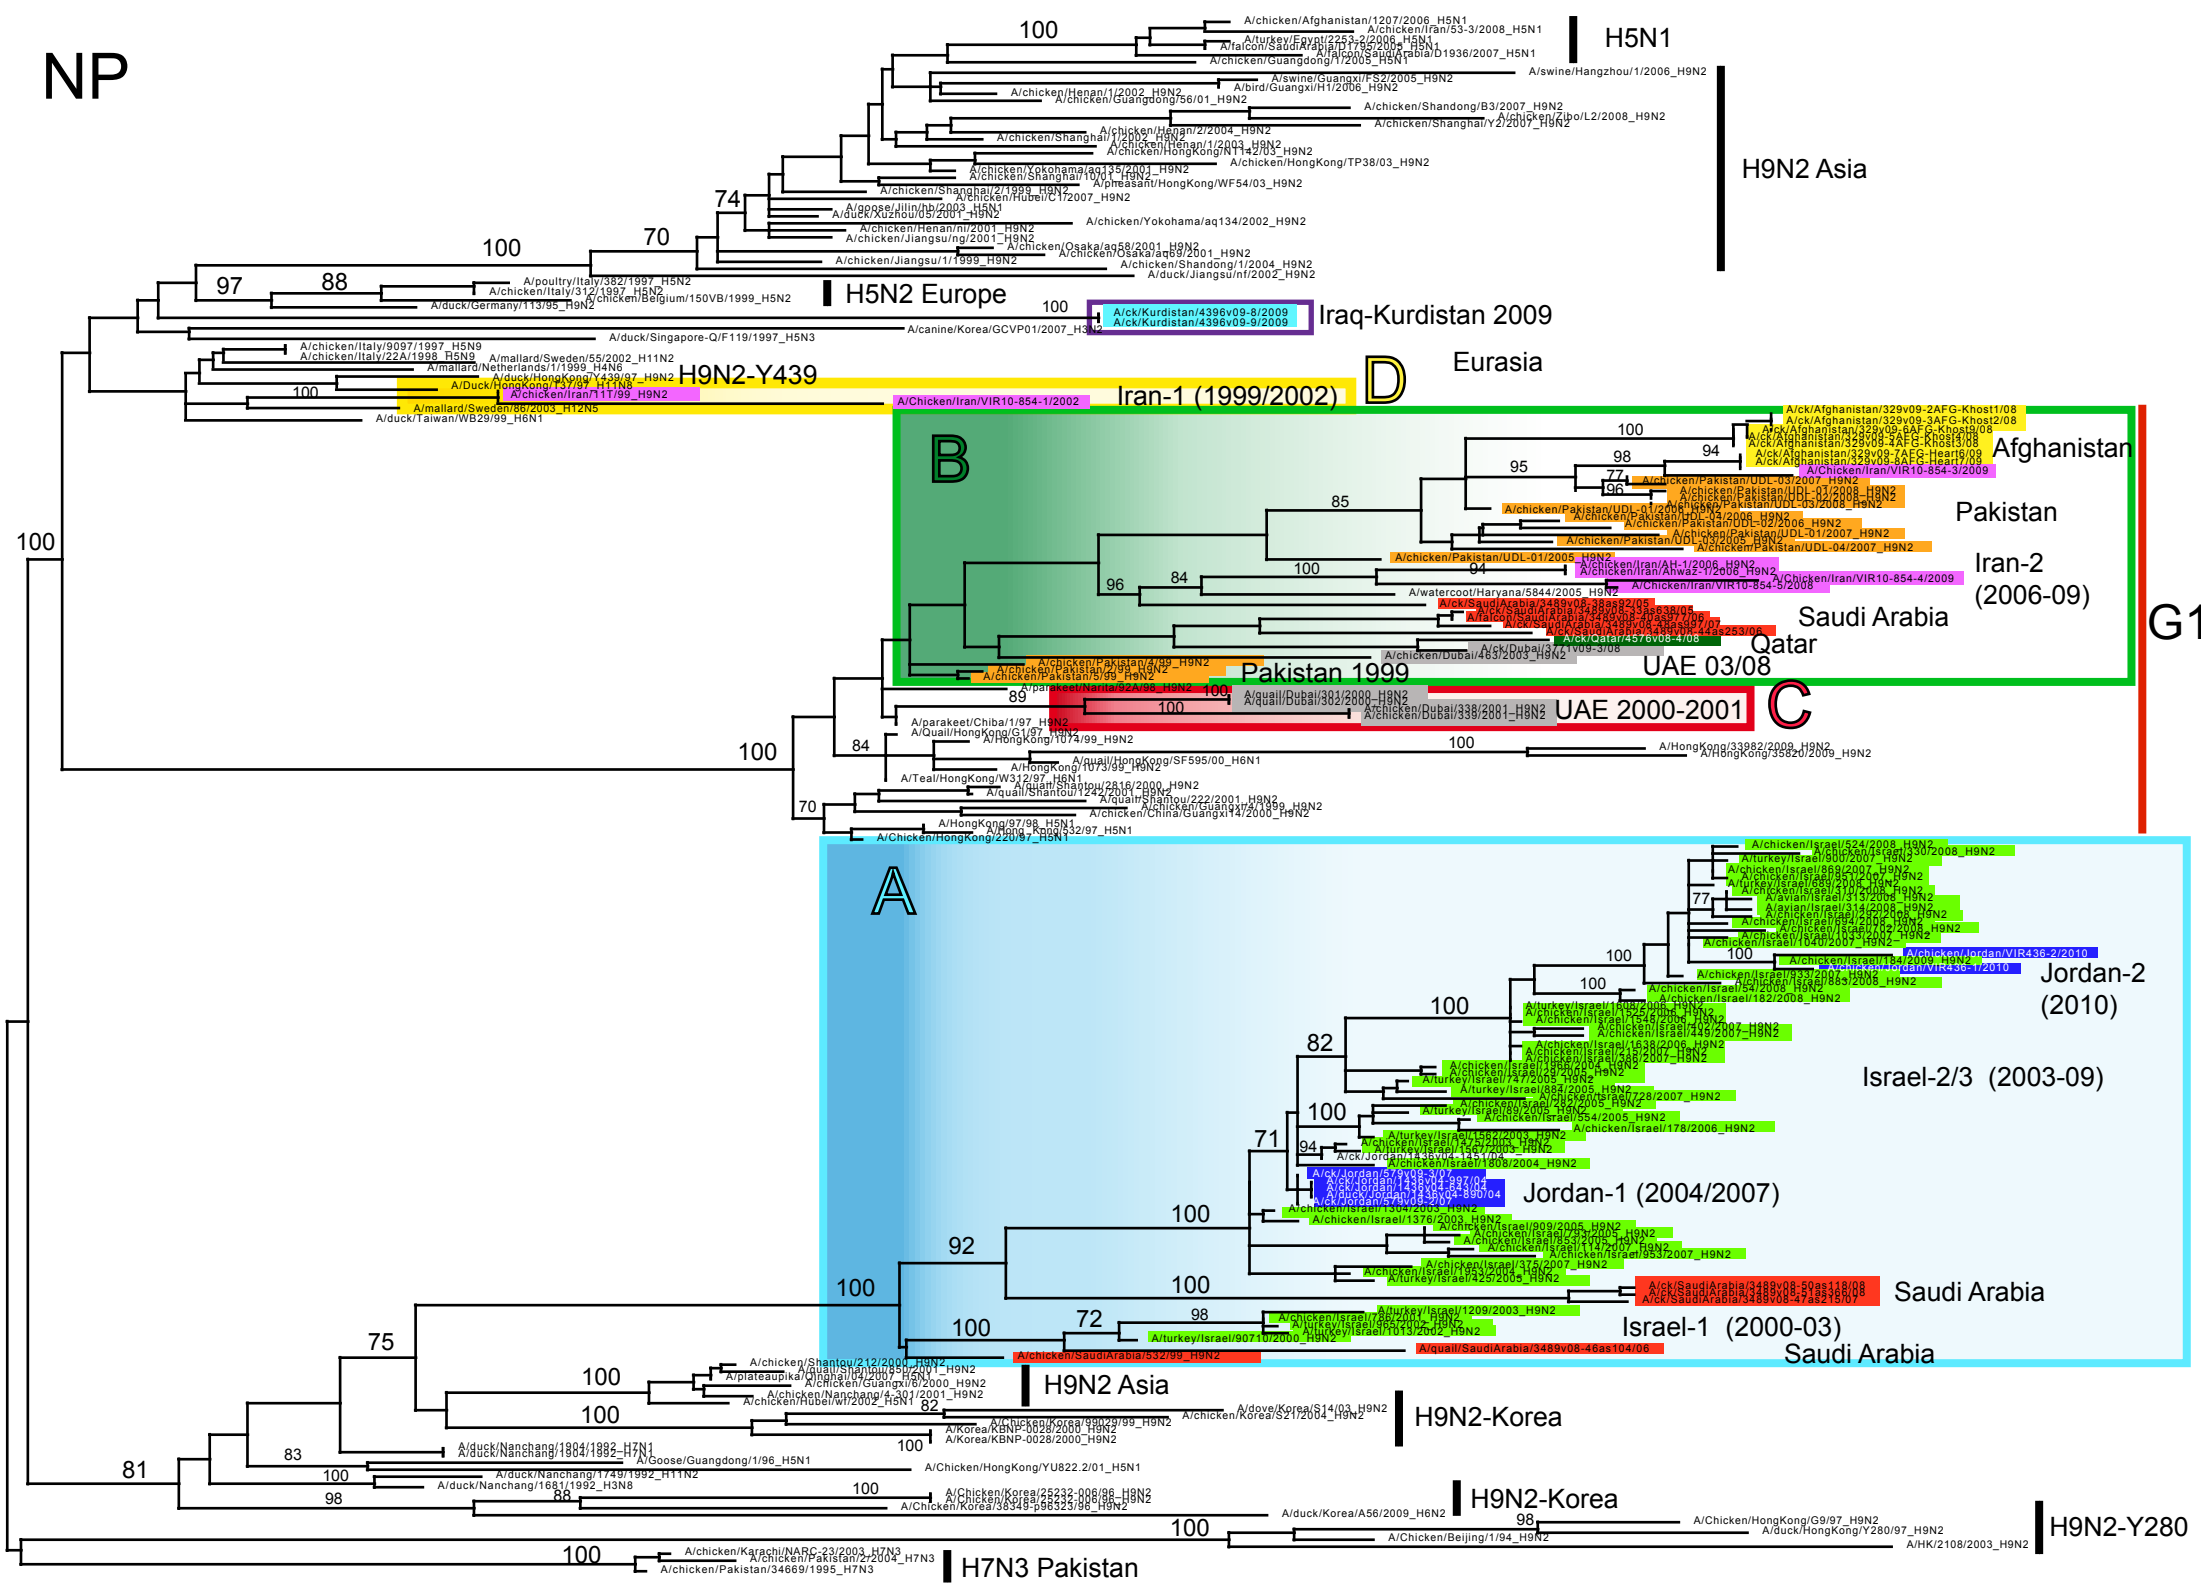

Supplement: supp_85_16_8413__4.pdf [file supp_85_16_8413__4.pdf]

NS

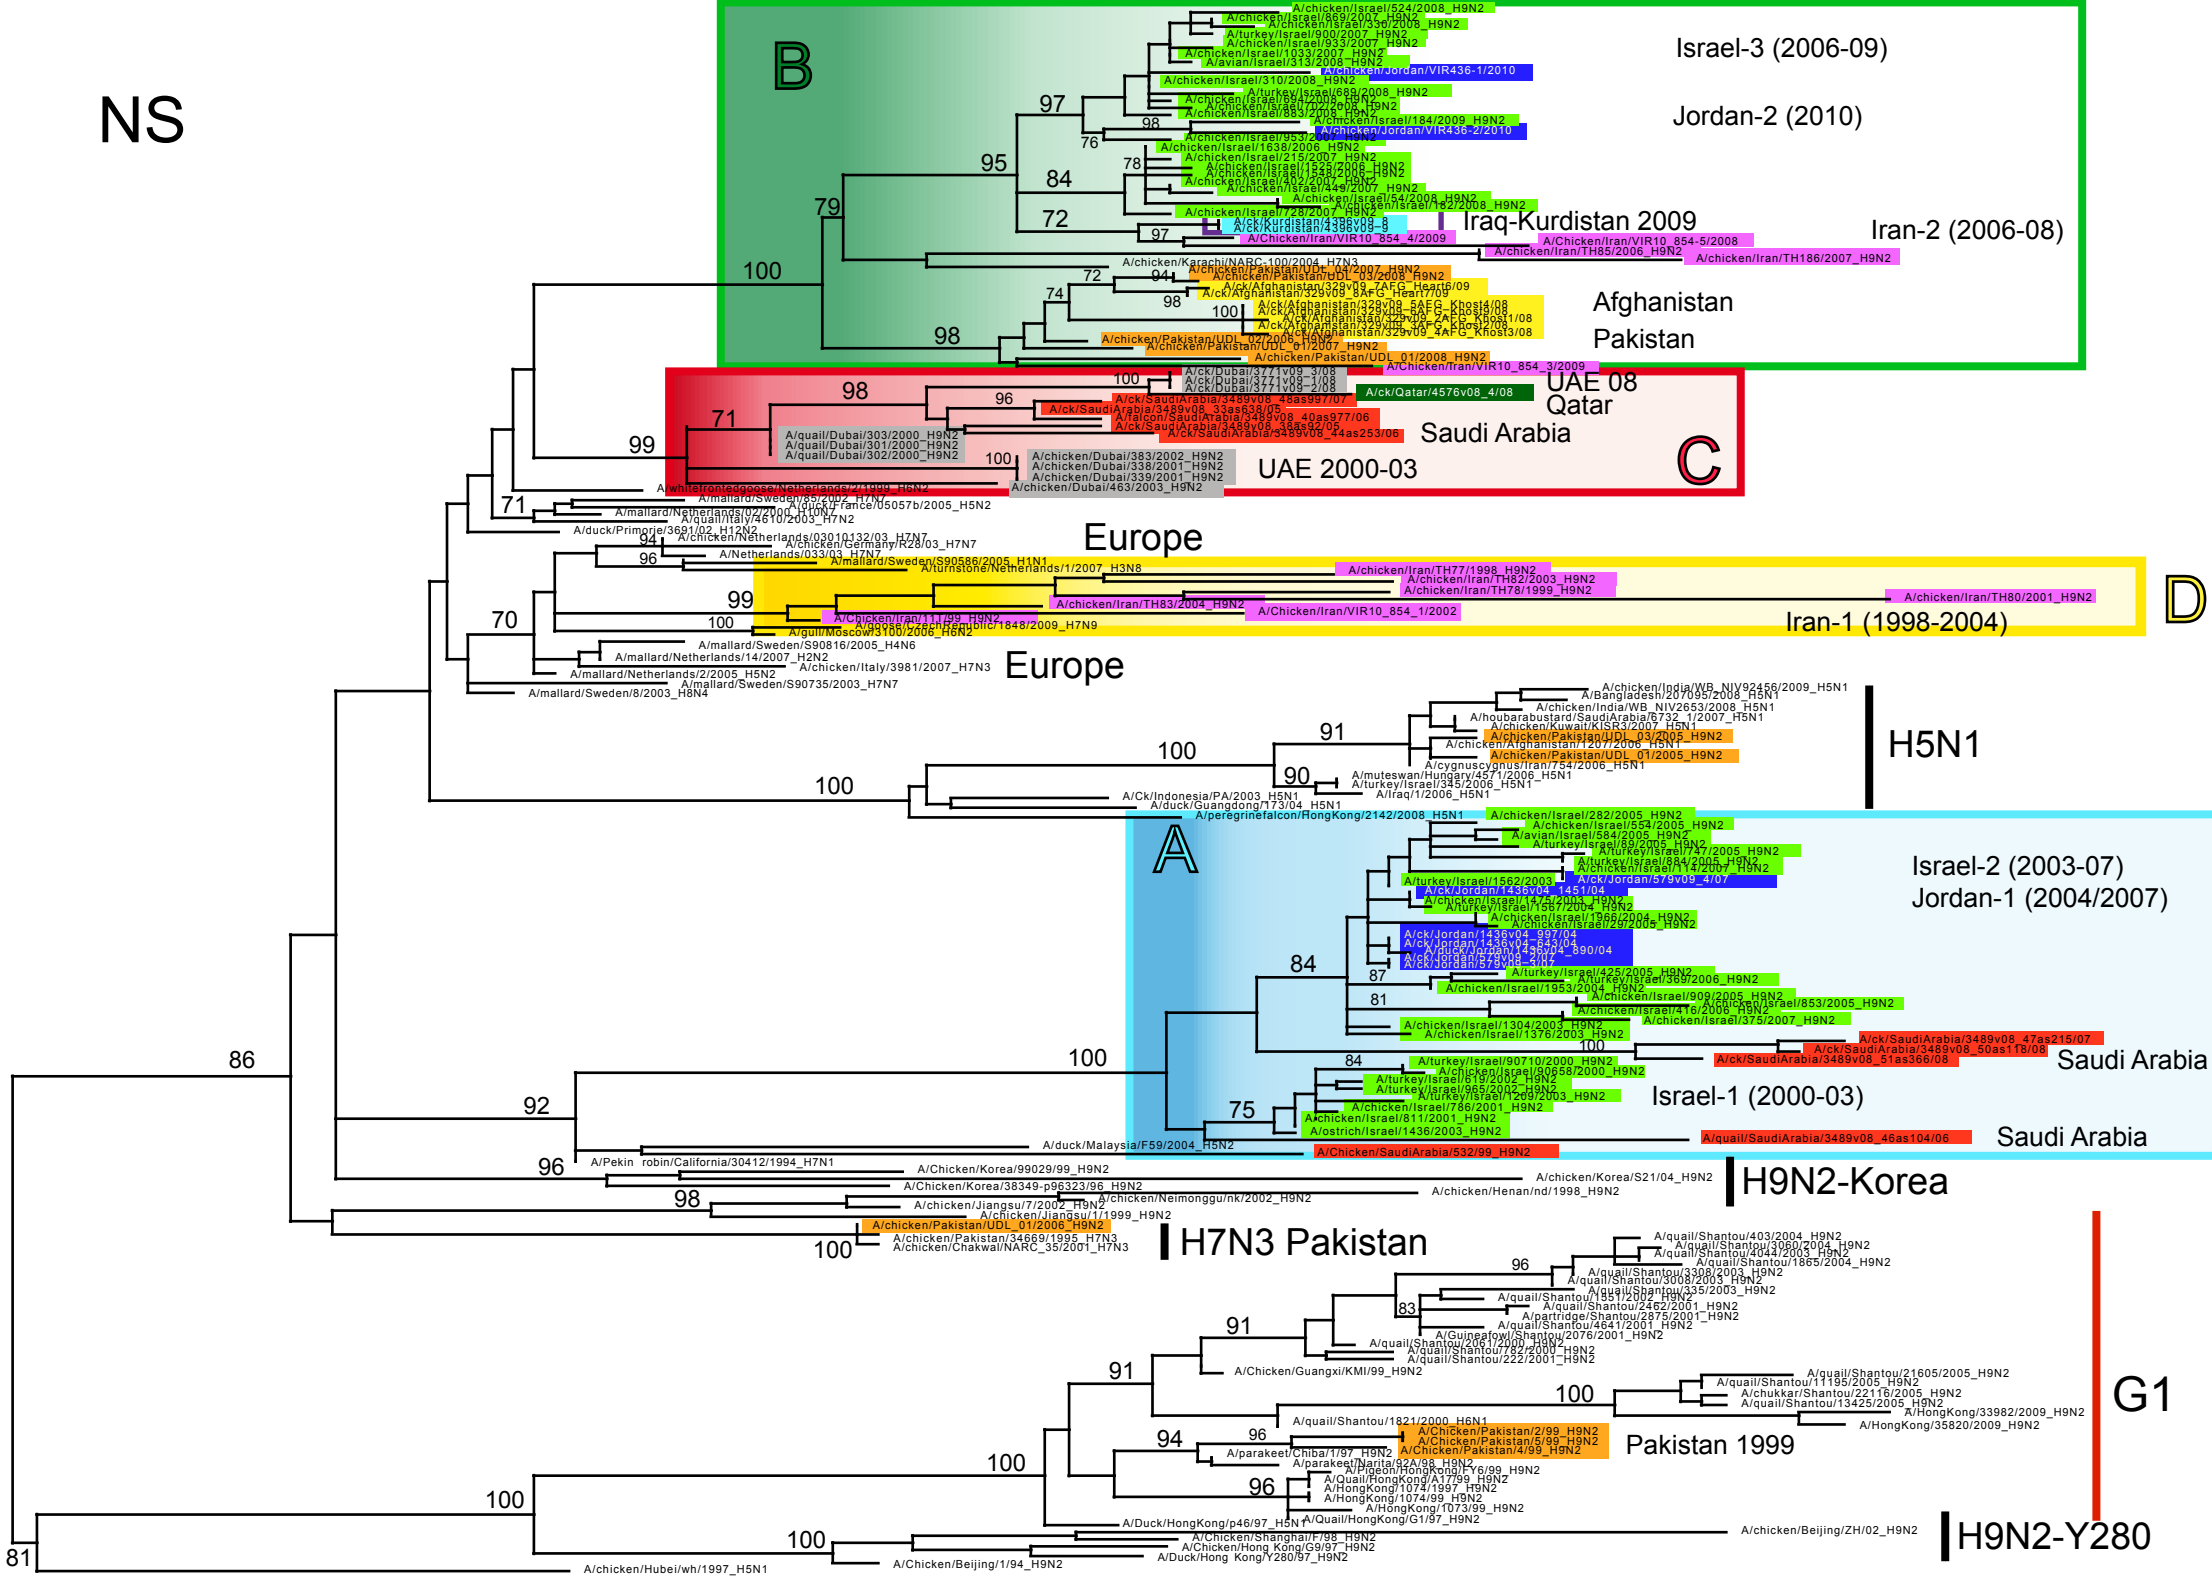

Supplement: supp_85_16_8413__6.pdf [file supp_85_16_8413__6.pdf]
